# Supplementary material
Source: Springer Nature journal article supplement (https://www.springermedizin.de/resource/supplementary/12916_2012_785_MOESM1_ESM.pdf/9598296)
Supplement: MOESM1 [file 9598296]

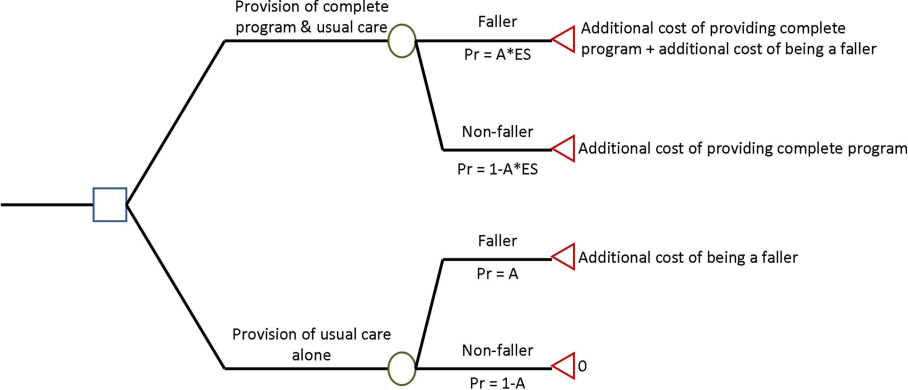

Notes:

A = Probability of cognitively intact patient becoming a faller under usual care conditions

ES = Effect size of intervention (risk of becoming a faller if exposed to complete program divided by risk of becoming a faller if not exposed to complete program)
